# Supplementary material
Source: PubMed Central journal article supplement (PMC6055161)
Supplement: pnas.1714044115.sapp.pdf [file pnas.1714044115.sapp.pdf]

## Supplementary Information for

### How functional traits influence plant growth and shade tolerance across the life-cycle

Daniel S. Falster Remko A. Duursma, Richard G. FitzJohn

Corresponding Daniel Falster.

E-mail: [daniel.falster@unsw.edu.au](mailto:daniel.falster@unsw.edu.au)

#### This PDF file includes:

Supplementary text

Figs. S1 to S5

Tables S1 to S2

References for SI reference citations

## Supporting Information Text

### Additional details on the FF16 growth model in the plant package

In this paper we use the FF16 growth model from the package `plant` (1), which is accessed via R (2). A full derivation of the Eqs. from the main text are described in Appendix of (1), see also (3). Below we repeat some additional details from (1), so that readers have a complete picture of the model.

The FF16 physiological model includes default values for all needed parameters (Table S1). Species are known to vary considerably in many of these parameters, such as  $\phi$ ,  $\rho$ ,  $\nu$ , and  $\omega$ ; so by varying parameters one can account for species differences. When altering a parameter in the model, however, one must also consider whether there are trade-offs linking parameters. This is achieved via a hyper-parameterisation function.

**Hyper-parameterisation of the FF16 model via traits.** `plant` allows for the hyper-parameterisation of the FF16 physiological model via plant functional traits: this enables simultaneous variation in multiple parameters in accordance with an assumed trade-off. The hyper-parameterisation function used in the current analysis differs slightly from that in (1). The functions implemented are as follows.

**Seed mass.** Effects of the trait seed mass, are naturally embedded in the equation determining fecundity and the initial height of seedlings. In addition, we let the accessory cost per seed be a multiple of seed size,  $\alpha_{f3} = \beta_{f1}\omega$ , as empirically observed (4).

**Nitrogen per unit leaf area.** Photosynthesis per unit leaf area and respiration rates per unit leaf mass (or area) are assumed to vary with leaf nitrogen per unit area,  $\nu$ . The calculation of respiration rates is already described above. To calculate the average annual photosynthesis for a leaf, we integrate the instantaneous rate per unit leaf area over the annual solar trajectory, using a rectangular-hyperbolic photosynthesis light response curve,

$$p(\nu, E) = \frac{1}{365d} \int_0^{365d} \frac{Y(t) + A_{\max} - \sqrt{(Y(t) + A_{\max})^2 - 4\beta_{f2}Y(t)A_{\max}}}{2\beta_{f2}} dt, \quad [1]$$

where  $A_{\max}$  is the maximum photosynthetic capacity of the leaf,  $\beta_{f2}$  is the curvature of the light response curve,  $Y(t) = \beta_{f3}I(t)$  is the initial yield of the light response curve, with  $\beta_{f3}$  being the quantum yield parameter,  $I(t) = k_I I_0(t) E$  is the intensity of light on the leaf surface, and  $I_0(t)$  is light incident on a surface perpendicular to the sun's rays directly above the canopy at time  $t$ . The profile of  $I_0(t)$  is given by a solar model adapted from (?).

We allow for the maximum photosynthetic capacity of the leaf to vary with leaf nitrogen per unit area, as

$$A_{\max} = \beta_{f1} \left( \frac{\nu}{\nu_0} \right)^{\beta_{f5}}, \quad [2]$$

where  $\beta_{f1}$  and  $\beta_{f5}$  are constants. The relationship is normalized around  $\nu_0$ , the global mean of leaf nitrogen per unit area.

**Leaf mass per unit area.** The trait leaf mass per unit area, denoted by  $\phi$ , directly influences growth by changing  $dA_1/dM_a$ . In addition, we link  $\phi$  to the rate of leaf turnover, based on a widely observed scaling relationship from (5) (Fig. S1),

$$k_1 = \beta_{k11} \left( \frac{\phi}{\phi_0} \right)^{-\beta_{k12}}. \quad [3]$$

This relationship is normalised around  $\phi_0$ , the global mean of  $\phi$ . This allows us to vary  $\beta_{k11}$  and  $\beta_{k12}$  without displacing the relationship from the observed mean.

We also vary the mass-based leaf respiration rate so that it stays constant per unit leaf area and varies with  $\phi$  and nitrogen per unit leaf area  $\nu$ , as empirically observed by (5),

$$r_1 = \frac{\beta_{f4} \nu}{\phi}. \quad [4]$$

**Wood density.** The trait wood density, denoted by  $\rho$ , directly influences growth by changing  $dA_1/dM_a$ . As for  $\phi$ , these relationships are normalized around  $\rho_0$ , the global mean of  $\rho$ . By default,  $\beta_{k12}$  and  $\beta_{ks2}$  are set to zero, so these linkages only become present when these parameters are set to something other than their default values.

The rate of sapwood respiration per unit volume is assumed to be constant, so sapwood respiration per unit mass varies as

$$r_s = \frac{\beta_{rs1}}{\rho}, \quad [5]$$

where  $\beta_{rs1}$  is a default rate per volume of sapwood. Similarly, the rate of bark respiration per unit mass varies as

$$r_b = \frac{\beta_{rb1}}{\rho}, \quad [6]$$

with  $\beta_{rb1} = 2\beta_{rs1}$ .

**Implementation of hyper-parameterisation function.** The hyper-parameterisation function used in this analysis is implemented as follows:

```

function(
    lma_0=0.1978791,
    B_kl1=0.4565855,
    B_kl2=1.71,
    rho_0=608.0,
    B_dI1=0.01,
    B_dI2=0.0,
    B_ks1=0.2,
    B_ks2=1.25, #0.0,
    B_rs1=4012.0,
    B_rb1=2.0*4012.0,
    B_f1 =3.0,
    narea=1.87e-3,
    narea_0=1.87e-3,
    B_lf1=5120.738 * 1.87e-3 * 24 * 3600 / 1e+06,
    B_lf2=0.75,
    B_lf3=0.04,
    B_lf4=21000*0.75,
    B_lf5=0.5,
    k_I=0.5,
    latitude=0) {
  assert_scalar <- function(x, name=deparse(substitute(x))) {
    if (length(x) != 1L) {
      stop(sprintf("%s must be a scalar", name), call. = FALSE)
    }
  }
  assert_scalar(lma_0)
  assert_scalar(B_kl1)
  assert_scalar(B_kl2)
  assert_scalar(rho_0)
  assert_scalar(B_dI1)
  assert_scalar(B_dI2)
  assert_scalar(B_ks1)
  assert_scalar(B_ks2)
  assert_scalar(B_rs1)
  assert_scalar(B_rb1)
  assert_scalar(B_f1)
  assert_scalar(narea)
  assert_scalar(narea_0)
  assert_scalar(B_lf1)
  assert_scalar(B_lf2)
  assert_scalar(B_lf3)
  assert_scalar(B_lf4)
  assert_scalar(B_lf5)
  assert_scalar(k_I)
  assert_scalar(latitude)

  function(m, s, filter=TRUE) {
    with_default <- function(name, default_value=s[[name]]) {
      rep_len(if (name %in% colnames(m)) m[, name] else default_value,
              nrow(m))
    }
    lma      <- with_default("lma")
    rho      <- with_default("rho")
    omega    <- with_default("omega")
    narea    <- with_default("narea", narea)

    ## lma / leaf turnover relationship:
    k_l     <- B_kl1 * (lma / lma_0) ^ (-B_kl2)

    ## rho / mortality relationship:

```

```

d_I <- B_dI1 * (rho / rho_0) ^ (-B_dI2)

## rho / wood turnover relationship:
k_s <- B_ks1 * (rho / rho_0) ^ (-B_ks2)
k_b <- k_s

## rho / sapwood respiration relationship:

## Respiration rates are per unit mass, so this next line has the
## effect of holding constant the respiration rate per unit volume.
## So respiration rates per unit mass vary with rho, respiration
## rates per unit volume don't.
r_s <- B_rs1 / rho
# bark respiration follows from sapwood
r_b <- B_rb1 / rho

## omega / accessory cost relationship
a_f3 <- B_f1 * omega

## Narea, photosynthesis, respiration

assimilation_rectangular_hyperbolae <- function(I, Amax, theta, QY) {
  x <- QY * I + Amax
  (x - sqrt(x^2 - 4 * theta * QY * I * Amax)) / (2 * theta)
}

## Photosynthesis [mol CO2 / m2 / yr]
approximate_annual_assimilation <- function(narea, latitude) {
  E <- seq(0, 1, by=0.02)
  ## Only integrate over half year, as solar path is symmetrical
  D <- seq(0, 365/2, length.out = 10000)
  I <- plant:::PAR_given_solar_angle(plant:::solar_angle(D, latitude = abs(latitude)))

  Amax <- B_lf1 * (narea/narea_0) ^ B_lf5
  theta <- B_lf2
  QY <- B_lf3

  AA <- NA * E

  for (i in seq_len(length(E))) {
    AA[i] <- 2 * plant:::trapezium(D, assimilation_rectangular_hyperbolae(
      k_I * I * E[i], Amax, theta, QY))
  }
  if(all(diff(AA) < 1E-8)) {
    # line fitting will fail if all have are zero, or potentially same value
    ret <- c(last(AA), 0)
    names(ret) <- c("p1", "p2")
  } else {
    fit <- nls(AA ~ p1 * E/(p2 + E),
              data.frame(E = E, AA = AA),
              start = list(p1 = 100, p2 = 0.2))
    ret <- coef(fit)
  }
  ret
}

# This needed in case narea has length zero, in which case trapezium fails
a_p1 <- a_p2 <- 0 * narea
## TODO: Remove the 0.5 hardcoded default for k_I here, and deal
## with this more nicely.
if (length(narea) > 0 || k_I != 0.5) {

```

```

i <- match(narea, unique(narea))
y <- vapply(unique(narea), approximate_annual_assimilation,
            numeric(2), latitude)
a_p1 <- y["p1", i]
a_p2 <- y["p2", i]
}

## Respiration rates are per unit mass, so convert to mass-based
## rate by dividing with lma
## So respiration rates per unit mass vary with lma, while
## respiration rates per unit area don't.
r_l <- B_1f4 * narea / lma

extra <- cbind(k_l,          # lma
              d_I, k_s, k_b, r_s, r_b, # rho
              a_f3,        # omega
              a_p1, a_p2,   # narea
              r_l)         # lma, narea

overlap <- intersect(colnames(m), colnames(extra))
if (length(overlap) > 0L) {
  stop("Attempt to overwrite generated parameters: ",
       paste(overlap, collapse=", "))
}

## Filter extra so that any column where all numbers are within eps
## of the default strategy are not replaced:
if (filter) {
  if (nrow(extra) == 0L) {
    extra <- NULL
  } else {
    pos <- diff(apply(extra, 2, range)) == 0
    if (any(pos)) {
      eps <- sqrt(.Machine$double.eps)
      x1 <- extra[1, pos]
      x2 <- unlist(s[names(x1)])
      drop <- abs(x1 - x2) < eps & abs(1 - x1/x2) < eps
      if (any(drop)) {
        keep <- setdiff(colnames(extra), names(drop)[drop])
        extra <- extra[, keep, drop=FALSE]
      }
    }
  }
}

if (!is.null(extra)) {
  m <- cbind(m, extra)
}
m
}
}
<environment: 0x7f9512489620>

```

**Table S1. Core parameter of the FF16 physiological model.**

| Description                                                          | Symbol         | Unit                                  | Code  | Value        |
|----------------------------------------------------------------------|----------------|---------------------------------------|-------|--------------|
| <b>Plant construction</b>                                            |                |                                       |       |              |
| Crown-shape parameter                                                | $\eta$         |                                       | eta   | 12           |
| Leaf mass per area                                                   | $\phi$         | kg m <sup>-2</sup>                    | lma   | 0.1978791    |
| Wood density                                                         | $\rho$         | kg m <sup>-3</sup>                    | rho   | 608          |
| Sapwood area per unit leaf area                                      | $\theta$       |                                       | theta | 0.0002141786 |
| Height of plant with leaf area of 1m <sup>2</sup>                    | $\alpha_{l1}$  | m                                     | a_l1  | 2.17         |
| Exponent of relationship between height and leaf area                | $\alpha_{l2}$  |                                       | a_l2  | 0.5          |
| Root mass per unit leaf area                                         | $\alpha_{r1}$  | kg m <sup>-2</sup>                    | a_r1  | 0.07         |
| Ratio of bark area to sapwood area                                   | $\alpha_{b1}$  |                                       | a_b1  | 0.17         |
| <b>Production</b>                                                    |                |                                       |       |              |
| Leaf photosynthesis per area                                         | $\alpha_{p1}$  | mol yr <sup>-1</sup> m <sup>-2</sup>  | a_p1  | 151.1778     |
| Saturation of leaf photosynthesis per area                           | $\alpha_{p2}$  |                                       | a_p2  | 0.2047162    |
| Yield = fraction of carbon fixed converted into mass                 | $\alpha_y$     |                                       | a_y   | 0.7          |
| Biomass per mol carbon                                               | $\alpha_{bio}$ | kg mol <sup>-1</sup>                  | a_bio | 0.0245       |
| Leaf respiration per mass                                            | $r_l$          | mol yr <sup>-1</sup> kg <sup>-1</sup> | r_l   | 198.4545     |
| Fine-root respiration per mass                                       | $r_r$          | mol yr <sup>-1</sup> kg <sup>-1</sup> | r_r   | 217          |
| Sapwood respiration per mass                                         | $r_s$          | mol yr <sup>-1</sup> kg <sup>-1</sup> | r_s   | 6.598684     |
| Bark respiration per mass                                            | $r_b$          | mol yr <sup>-1</sup> kg <sup>-1</sup> | r_b   | 13.19737     |
| Turnover rate for leaves                                             | $k_l$          | yr <sup>-1</sup>                      | k_l   | 0.1521952    |
| Turnover rate for sapwood                                            | $k_s$          | yr <sup>-1</sup>                      | k_s   | 0.2          |
| Turnover rate for bark                                               | $k_b$          | yr <sup>-1</sup>                      | k_b   | 0.2          |
| Turnover rate for fine roots                                         | $k_r$          | yr <sup>-1</sup>                      | k_r   | 1            |
| <b>Fecundity</b>                                                     |                |                                       |       |              |
| Seed mass                                                            | $\omega$       | kg                                    | omega | 0.000038     |
| Height at maturation                                                 | $H_{mat}$      | m                                     | hmat  | 15           |
| Maximum allocation to reproduction                                   | $\alpha_{f1}$  |                                       | a_f1  | 0.8          |
| Parameter determining rate of change in $r(x, m_l)$ around $H_{mat}$ | $\alpha_{f2}$  |                                       | a_f2  | 10           |

**Table S2. Parameters for hyper-parameterisation of the FF16 physiological model.**

| Description                                                                                         | Symbol        | Unit                                | Code    | Value     |
|-----------------------------------------------------------------------------------------------------|---------------|-------------------------------------|---------|-----------|
| <b>Leaf turnover</b>                                                                                |               |                                     |         |           |
| Global average leaf mass per area                                                                   | $\phi_0$      | $\text{kg m}^{-2}$                  | lma_0   | 0.1978791 |
| Rate of leaf turnover at average leaf mass per unit leaf area, $\phi_0$                             | $\beta_{k11}$ | $\text{yr}^{-1}$                    | B_k11   | 0.4565855 |
| Scaling exponent for $\phi$ in leaf turnover                                                        | $\beta_{k12}$ |                                     | B_k12   | 1.71      |
| <b>Sapwood turnover</b>                                                                             |               |                                     |         |           |
| Global average wood density                                                                         | $\rho_0$      | $\text{kg m}^{-3}$                  | rho_0   | 608       |
| Rate of sapwood turnover at average wood density, $\rho_0$                                          | $\beta_{ks1}$ | $\text{yr}^{-1}$                    | B_ks1   | 0.2       |
| Scaling exponent for $\rho$ in sapwood turnover                                                     | $\beta_{ks2}$ |                                     | B_ks2   | 1.25      |
| <b>Photosynthesis</b>                                                                               |               |                                     |         |           |
| Leaf nitrogen per unit leaf area                                                                    | $\nu$         | $\text{kg m}^{-2}$                  | narea   | 0.00187   |
| Global average nitrogen per unit leaf area                                                          | $\nu_0$       | $\text{kg m}^{-2}$                  | narea_0 | 0.00187   |
| Potential CO <sub>2</sub> photosynthesis at average leaf nitrogen, $\nu_0$                          | $\beta_{1f1}$ | $\text{mol d}^{-1} \text{m}^{-2}$   | B_1f1   | 0.8273474 |
| Curvature of light response curve                                                                   | $\beta_{1f2}$ |                                     | B_1f2   | 0.75      |
| Quantum yield of leaf photosynthesis (CO <sub>2</sub> per unit photosynthetically active radiation) | $\beta_{1f3}$ |                                     | B_1f3   | 0.04      |
| Scaling exponent for leaf nitrogen in maximum leaf photosynthesis                                   | $\beta_{1f5}$ |                                     | B_1f5   | 0.5       |
| <b>Respiration</b>                                                                                  |               |                                     |         |           |
| CO <sub>2</sub> respiration per unit leaf nitrogen                                                  | $\beta_{1f4}$ | $\text{mol yr}^{-1} \text{kg}^{-1}$ | B_1f4   | 15750     |
| CO <sub>2</sub> respiration per unit sapwood volume                                                 | $\beta_{rs1}$ | $\text{mol yr}^{-1} \text{m}^{-3}$  | B_rs1   | 4012      |
| CO <sub>2</sub> respiration per unit bark volume                                                    | $\beta_{rb1}$ | $\text{mol yr}^{-1} \text{m}^{-3}$  | B_rb1   | 8024      |

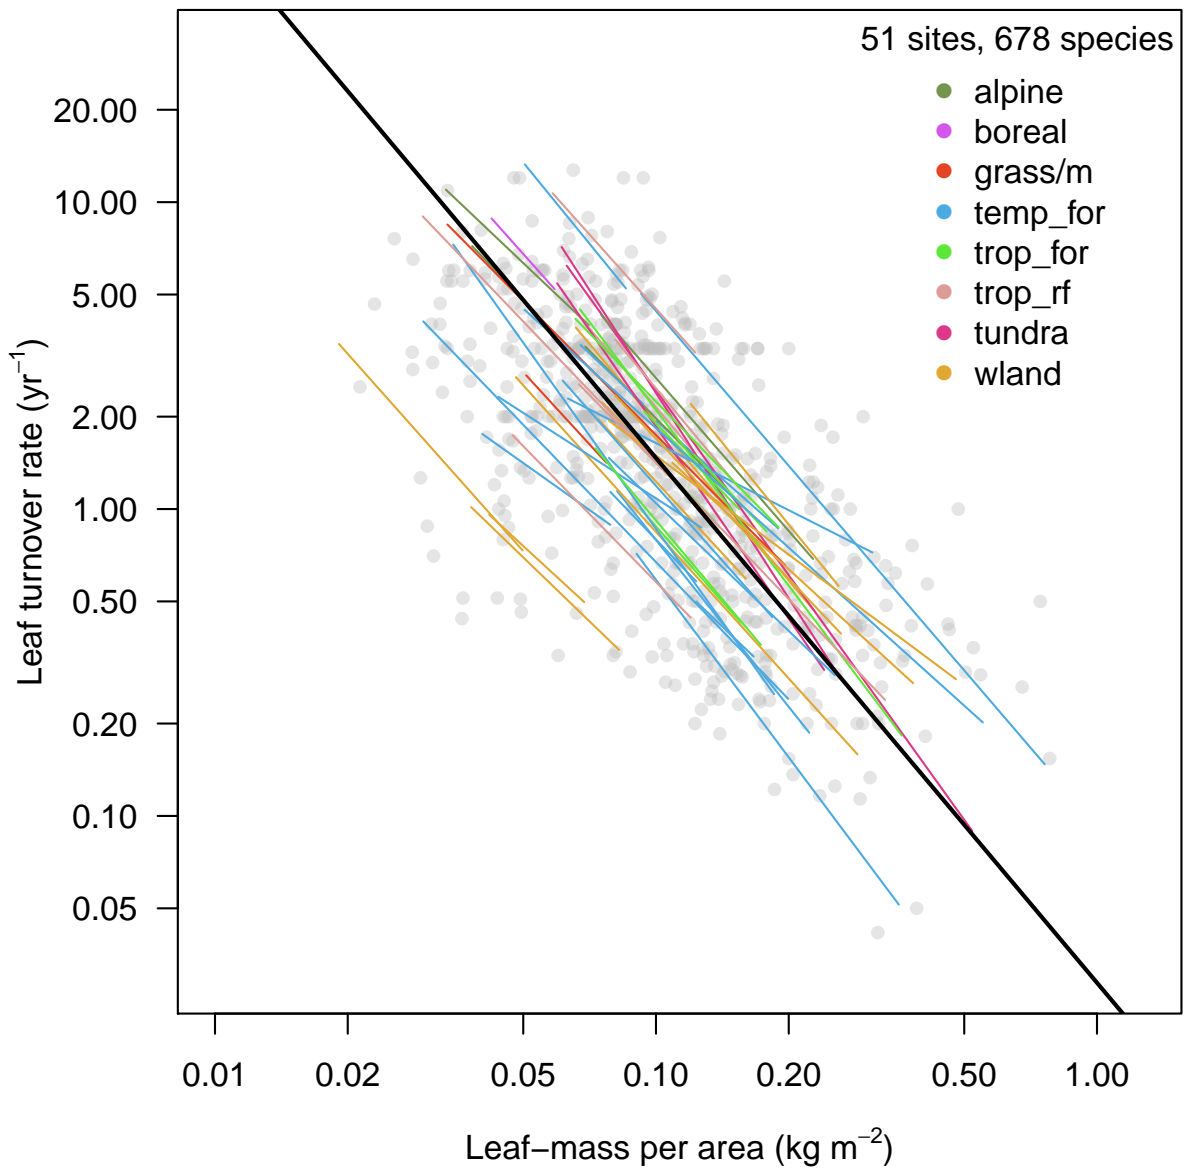

**Fig. S1. Leaf turnover decreases with leaf-mass per unit leaf area.** Data from (5) for 678 species from 51 sites, each point giving a species-average. Lines show standardised major axis lines fitted to data from each site, with intensity of shading adjusted according to strength of the relationship.



a) Architectural layout

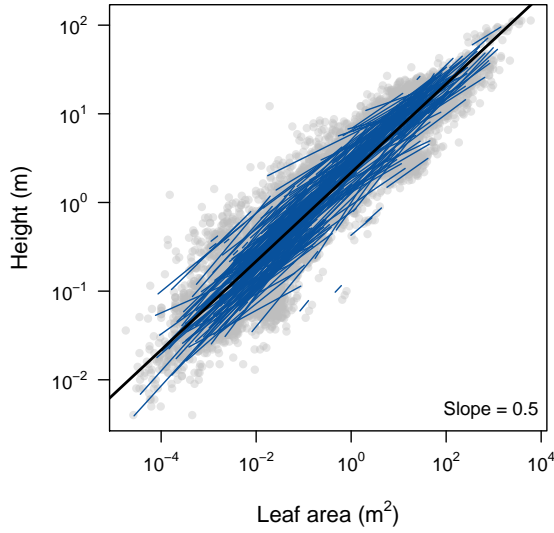

b) Pipe model

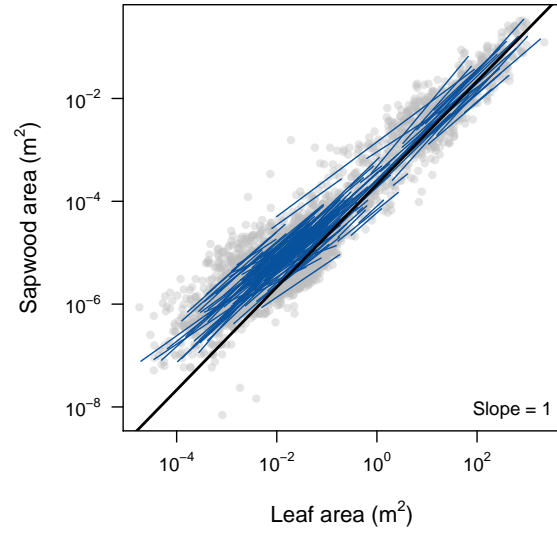

c) Roots

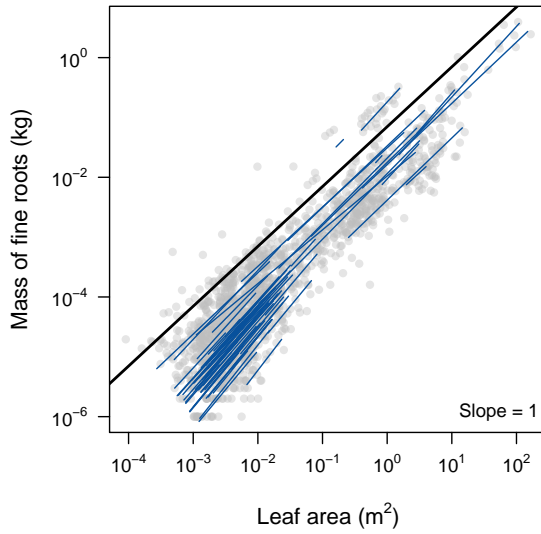

d) Live stem mass per leaf area

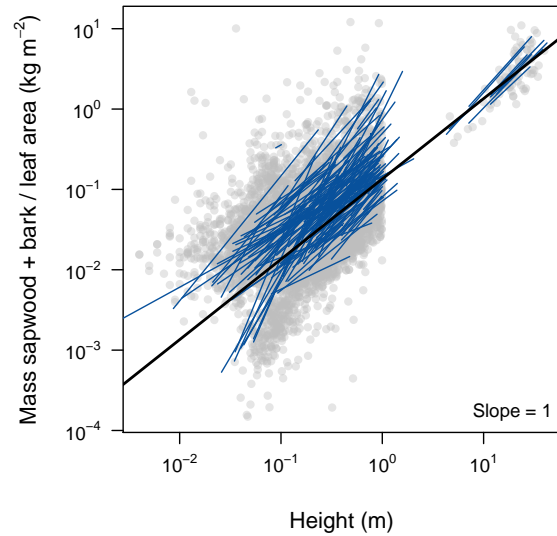

**Fig. S2. Assumptions of a functional balance model for plant construction.** Each dot is a single plant from the BAAD (6). Blue lines show standardised major axis lines fit to different species. The black line shows the relationship assumed in this paper, with slope given by the functional-balance assumptions in Table 4 from main text.

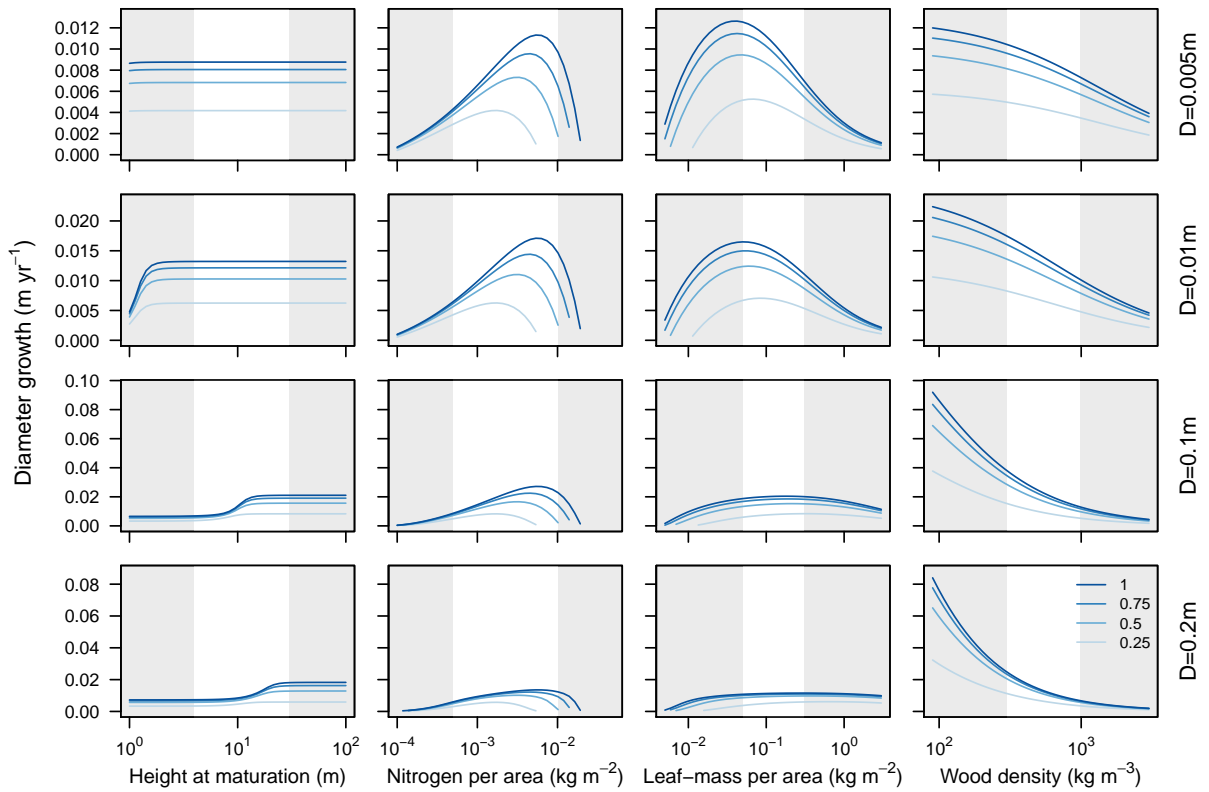

**Fig. S3. Effect of four traits on stem-diameter growth rate for different-sized plants.** Growth rates were simulated using the `p1ant` model, applying the trade-offs describing in Table 3. Each panel shows how growth is influenced by a different trait for plants of a given height, and across a series of canopy openness values from completely open (light blue,  $E = 1$ ) to heavily shaded (dark line,  $E = 0.25$ ). For any given value of trait and  $E$ , plants were grown to the desired stem-diameter and their growth rate estimated. Changes in trait-growth relationships are summarised in Table 5.

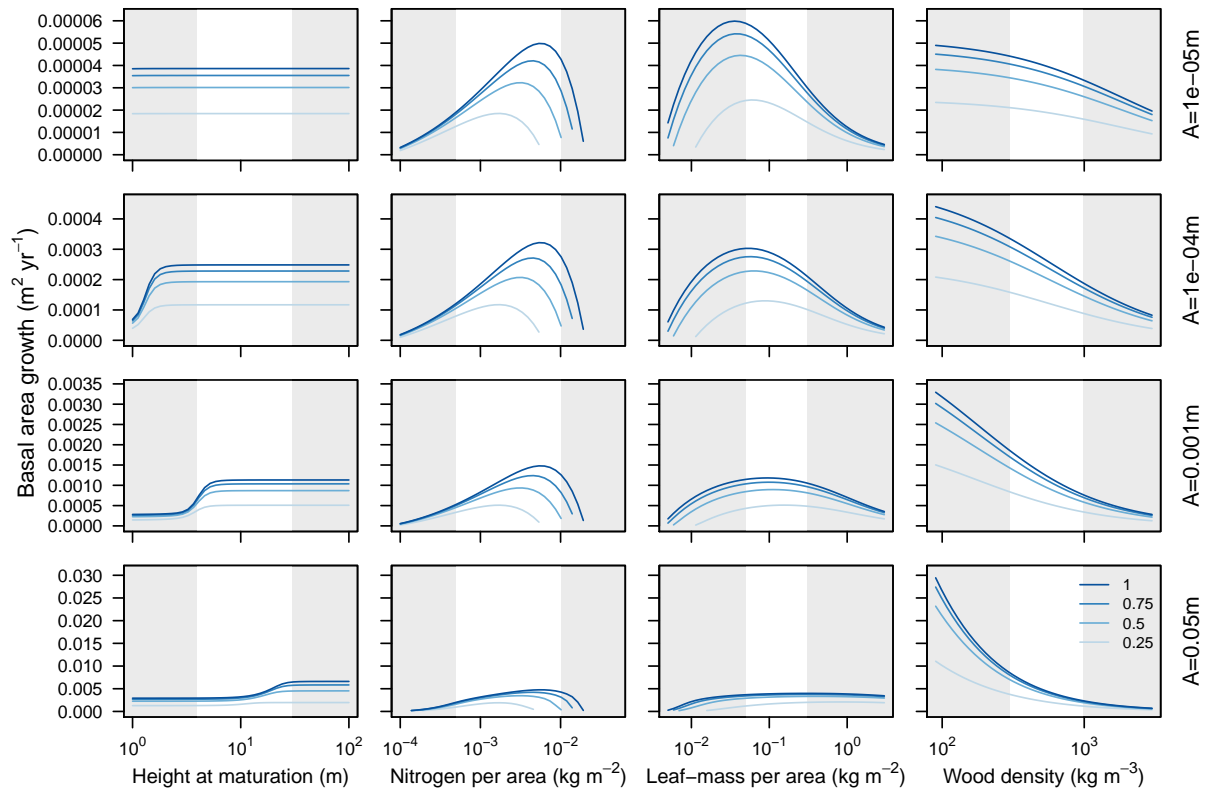

**Fig. S4. Effect of four traits on stem-area growth rate for different-sized plants.** Growth rates were simulated using the `p1ant` model, applying the trade-offs describing in Table 3. Each panel shows how growth is influenced by a different trait for plants of a given height, and across a series of canopy openness values from completely open (light blue,  $E = 1$ ) to heavily shaded (dark line,  $E = 0.25$ ). For any given value of trait and  $E$ , plants were grown to the desired stem-area and their growth rate estimated. Changes in trait-growth relationships are summarised in Table 5.

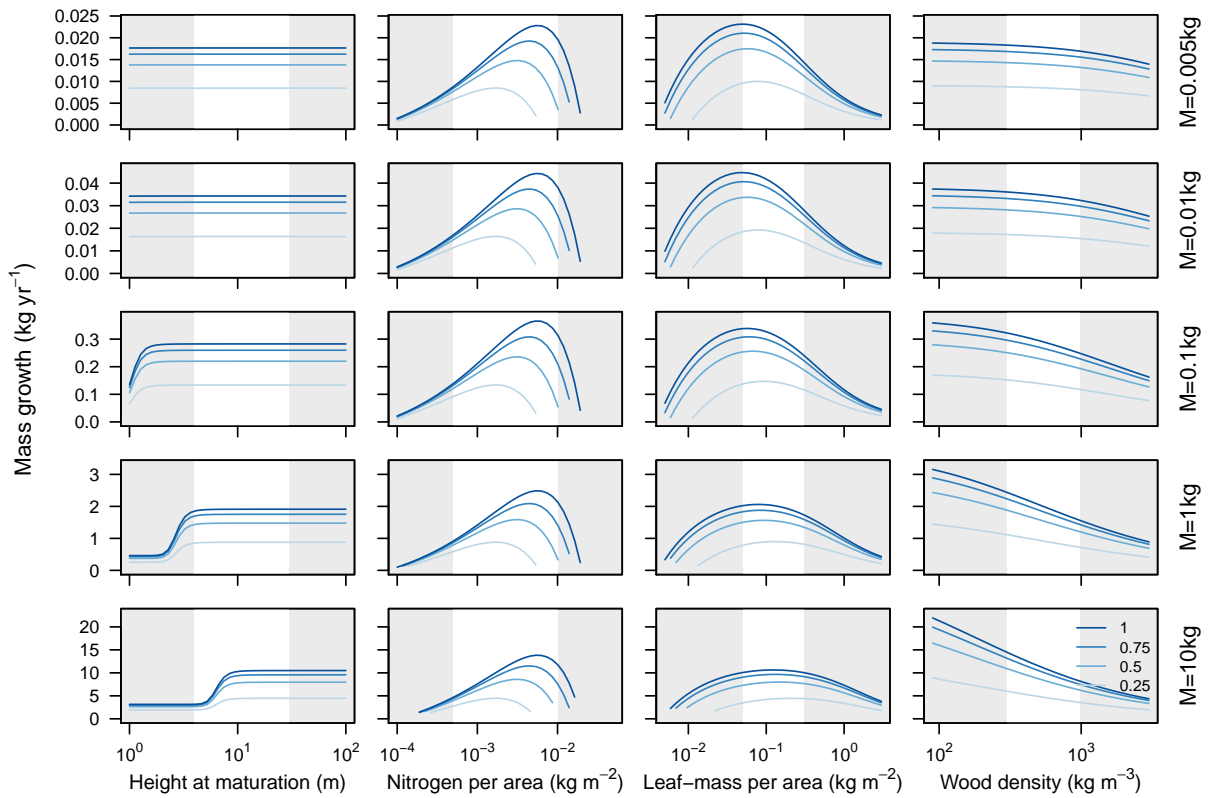

**Fig. S5. Effect of four traits on plant mass growth rate for different-sized plants.** Growth rates were simulated using the `p1ant` model, applying the trade-offs describing in Table 3. Each panel shows how growth is influenced by a different trait for plants of a given height, and across a series of canopy openness values from completely open (light blue,  $E = 1$ ) to heavily shaded (dark line,  $E = 0.25$ ). For any given value of trait and  $E$ , plants were grown to the desired mass and their growth rate estimated. Changes in trait-growth relationships are summarised in Table 5.

## References

1. Falster DS, FitzJohn RG, Brännström Å, Dieckmann U, Westoby M (2016) plant: A package for modelling forest trait ecology and evolution. *Methods in Ecology and Evolution* 7:136–146.
2. R Core Team (2015) *R: a language and environment for statistical computing* (R Foundation for Statistical Computing, Vienna, Austria).
3. Falster DS, Brännström Å, Dieckmann U, Westoby M (2011) Influence of four major plant traits on average height, leaf-area cover, net primary productivity, and biomass density in single-species forests: a theoretical investigation. *Journal of Ecology* 99(1):148–164.
4. Henery M, Westoby M (2001) Seed mass and seed nutrient content as predictors of seed output variation between species. *Oikos* 92:479–490.
5. Wright IJ, et al. (2004) The world-wide leaf economics spectrum. *Nature* 428(2403):821–827.
6. Falster DS, et al. (2015) BAAD: a Biomass And Allometry Database for woody plants. *Ecology* 96(5):1445.
